# Supplementary material
Source: publisher site journal article supplement (https://www.spandidos-publications.com/5847/downloadSupplementary)
Supplement: Supplementary file 1 [file downloadSupplementary]

Table SI. Characteristics of 3,727 enrolled patients.

| Characteristic, n (%)               | No. of Patients (%) |                  | P-value |
|-------------------------------------|---------------------|------------------|---------|
|                                     | NCKUH               | Other institutes |         |
| No. of patients                     | 1,783 (47.8)        | 1,944 (52.2)     |         |
| Sex                                 |                     |                  | P>0.05  |
| Male                                | 911 (51.1)          | 994 (51.1)       |         |
| Female                              | 872 (48.9)          | 950 (48.9)       |         |
| Age                                 |                     |                  | P>0.05  |
| <65                                 | 852 (47.8)          | 798 (41.0)       |         |
| ≥65                                 | 931 (52.5)          | 1,146 (59.0)     |         |
| Histological type                   |                     |                  | P>0.05  |
| Adenocarcinoma                      | 1,568 (87.9)        | 1,762 (90.6)     |         |
| Adenosquamous carcinoma             | 18 (1.0)            | 33 (1.7)         |         |
| Squamous cell carcinoma             | 84 (4.7)            | 64 (3.3)         |         |
| NSCLC-NOS                           | 113 (6.3)           | 85 (4.4)         |         |
| Tumor sample                        |                     |                  | P>0.05  |
| Surgical specimen                   | 365 (20.5)          | 473 (24.3)       |         |
| Small biopsy or cell block specimen | 1,418 (79.5)        | 471 (75.7)       |         |

NCKUH, National Cheng Kung University Hospital; NSCLC-NOS, non-small cell lung cancer-not otherwise specified.
